# Supplementary material for: Enhancing Community Participation through Age-Friendly Ecosystems: A Rapid Realist Review
Source: MDPI journal article supplement (doi:10.3390/geriatrics8030052), 2023-05-11
Supplement: s1 [file s1]

**Figure S2: Updated PRISMA flow diagram**

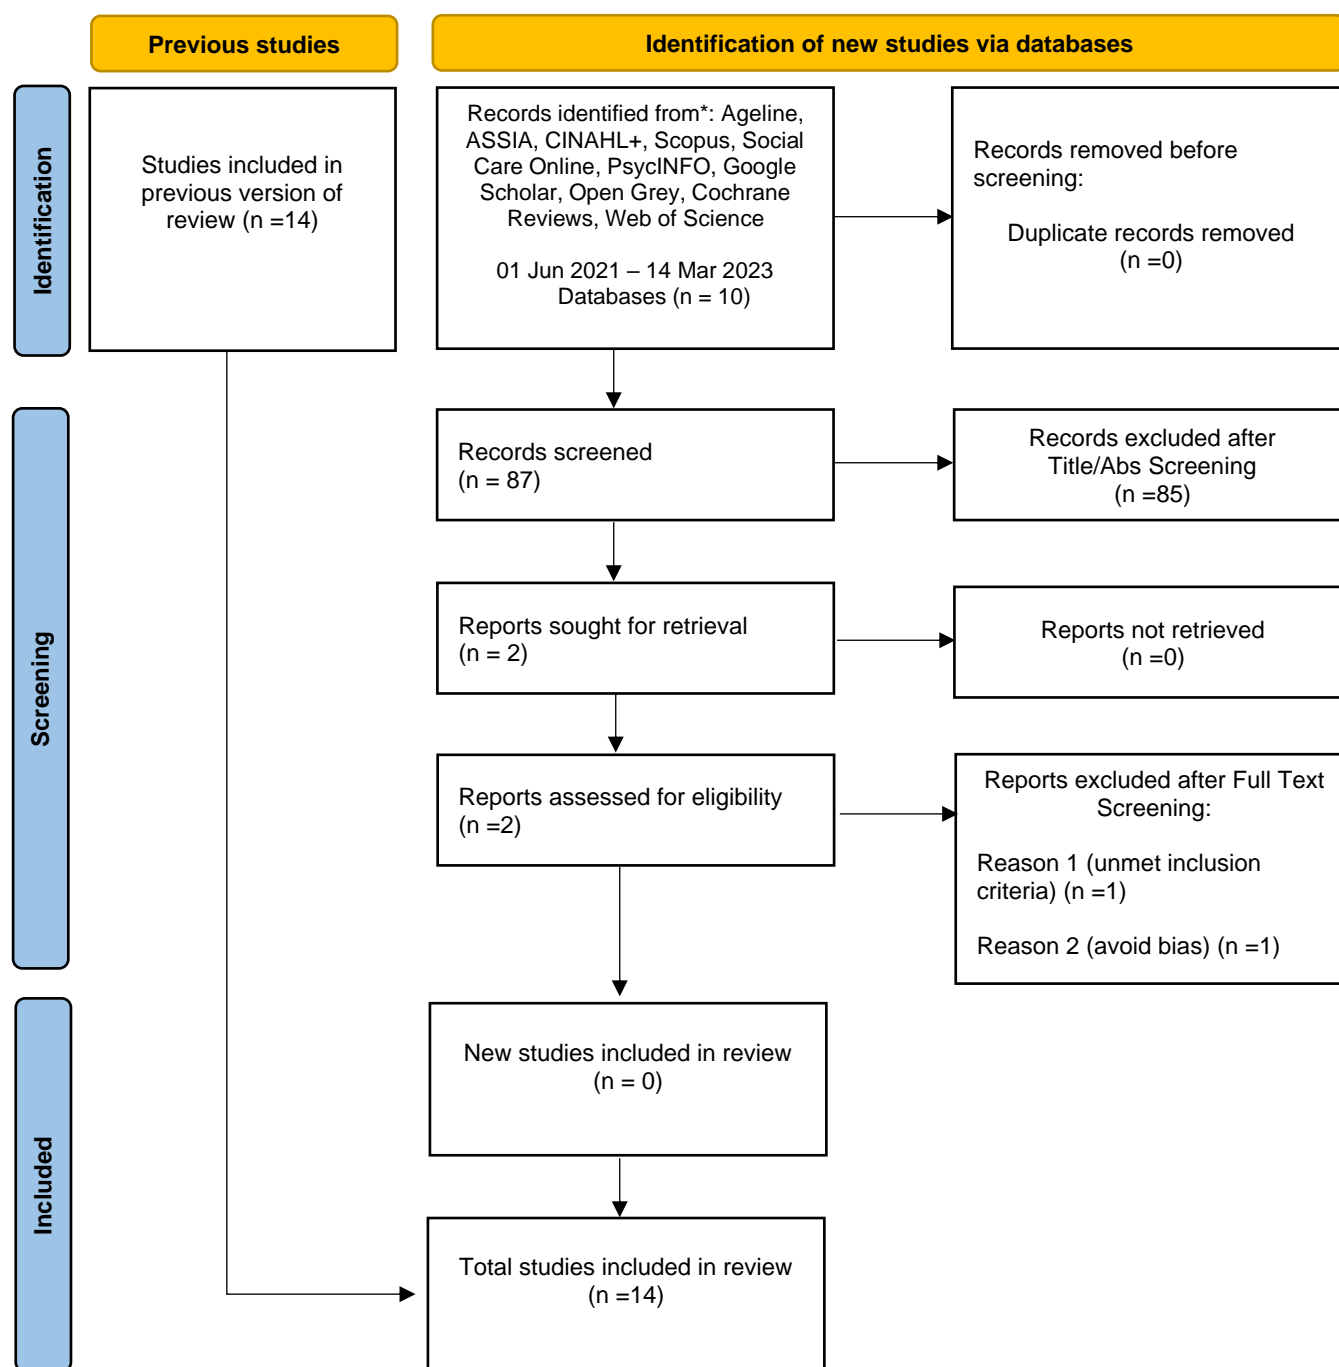

Based on Page MJ, McKenzie JE, Bossuyt PM, Boutron I, Hoffmann TC, Mulrow CD, et al. The PRISMA 2020 statement: an updated guideline for reporting systematic reviews. BMJ 2021;372:n71. DOI: 10.1136/bmj.n71
